# Supplementary material for: The HADHSC Gene Encoding Short-Chain l-3-Hydroxyacyl-CoA Dehydrogenase (SCHAD) and Type 2 Diabetes Susceptibility
Source: Oxford University Press journal article supplement (doi:10.2337/db06-0414), 2006-10-25
Supplement: pg3193onlineappendix.doc [file pg3193onlineappendix.doc]

**Suplementary table 1.** Genotype distributions of the P86L variant in *HADHSC.*

|  | **HS1** |  | **HS2** |  | **DK1** |  | **DK2** |  |
| --- | --- | --- | --- | --- | --- | --- | --- | --- |
|  | **NGT** | **T2DM** | **NGT** | **T2DM** | **NGT** | **T2DM** | **NGT** | **T2DM** |
| CC | 213 (82.3) | 181 (86.3) | 240 (84.8) | 258 (86.9) | 431 (81.8) | 524 (86.9) | 3753 (84.8) | 630 (83.3) |
| CT | 44 (16.9) | 29 (13.7) | 40 (14.1) | 39 (13.1) | 95 (18.0) | 76 (12.6) | 649 (14.6) | 121 (16.0) |
| TT | 2 (0.8) | 0 | 3 (1.1) | 0 | 1 (0.2) | 3 (0.5) | 27 (0.6) | 5 (0.7) |
| P trend |  | 0.14 |  | 0.23 |  | 0.11 |  | 0.96 |
| P rec |  | 0.62 |  | 0.50 |  | 0.32 |  | 0.88 |
| P dom |  | 0.18 |  | 0.37 |  | 0.06 |  | 0.84 |

P values obtained after logistic regression with adjustment for differences in age and gender assuming different models.

P trend (CC versus CT versus TT); P rec is a recessive model (CC+CT versus TT); P dom is a dominant model (CC versus CT+TT).
